# Supplementary material for: Engineering Mo/Mo2C/MoC hetero-interfaces for enhanced electrocatalytic nitrogen reduction
Source: Royal Society of Chemistry journal article supplement (doi:10.1039/d0ta03290e), 2020-01-01
Supplement: d0ta03290e1.pdf [file d0ta03290e1.pdf]

## Supporting Information

### **Engineering Mo/Mo<sub>2</sub>C/MoC Hetero-interfaces for Enhanced Electrocatalytic Nitrogen Reduction**

Ying Liu,<sup>†a</sup> Xiaorong Zhu,<sup>†a</sup> Qinghua Zhang,<sup>c</sup> Tang Tang,<sup>b,d</sup> Yun Zhang,<sup>b,d</sup> Lin Gu,<sup>c</sup> Yafei Li,<sup>a</sup> Jianchun Bao,<sup>a</sup> Zhihui Dai,<sup>\*a</sup> Jin-Song Hu,<sup>\*b,d</sup>

<sup>a</sup> Jiangsu Collaborative Innovation Center of Biomedical Functional Materials, School of Chemistry and Materials Science, Nanjing Normal University, Nanjing 210023, China

<sup>b</sup> Beijing National Laboratory for Molecular Sciences (BNLMS), CAS Key Laboratory of Molecular Nanostructure and Nanotechnology, Institute of Chemistry, Chinese Academy of Sciences, Beijing 100190, China

<sup>c</sup> Beijing National Laboratory for Condensed Matter Physics, Institute of Physics, Chinese Academy of Sciences, Beijing 100190, China

<sup>d</sup> University of the Chinese Academy of Sciences, Beijing 100049, China

<sup>†</sup> These authors contributed equally to this work.

Corresponding Author

[\\*hujs@iccas.ac.cn](mailto:*hujs@iccas.ac.cn)

[\\*daizhihuii@njnu.edu.cn](mailto:*daizhihuii@njnu.edu.cn)

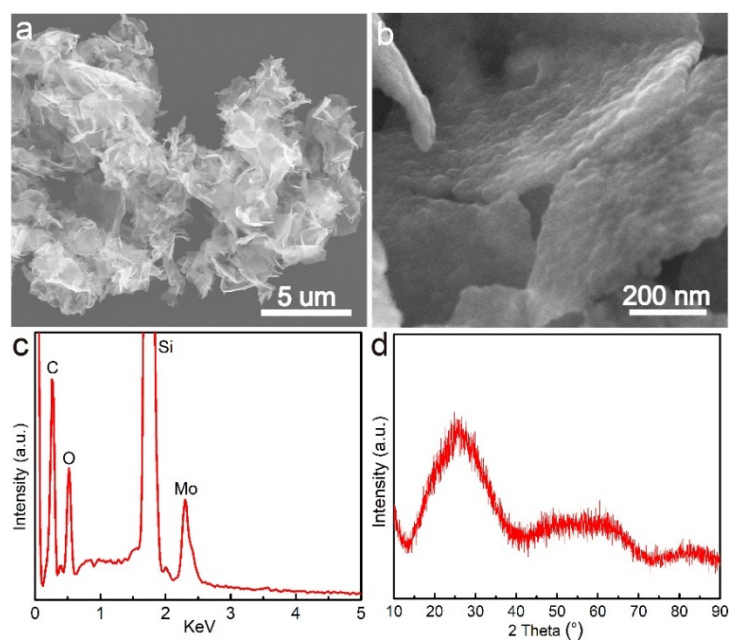

**Figure S1.** (a) Low- and (b) high-magnification SEM images, (c) EDS profile and (d) XRD pattern of the Mo-containing precursor.

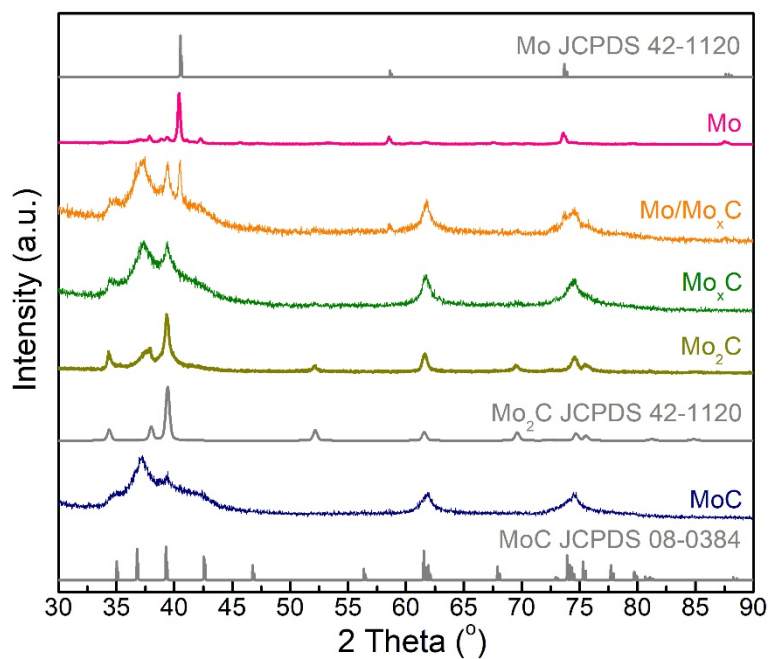

**Figure S2.** XRD patterns for MoC, Mo<sub>2</sub>C, Mo<sub>x</sub>C, Mo/Mo<sub>x</sub>C and Mo samples.

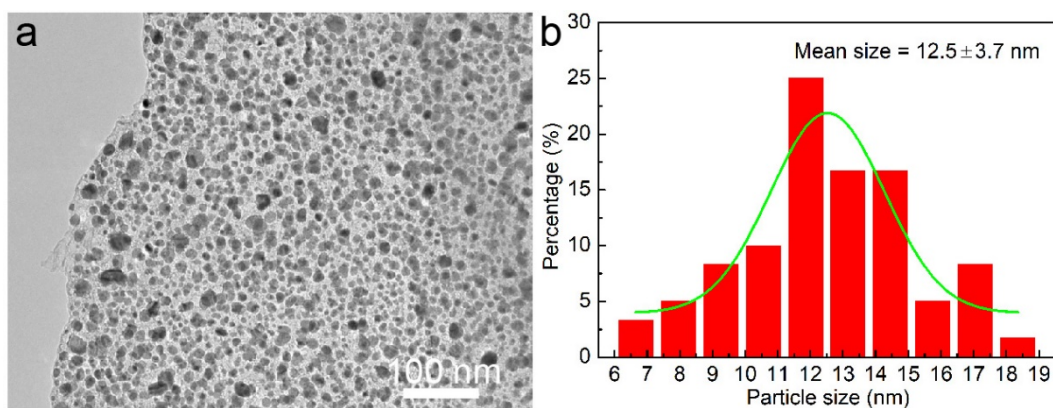

**Figure S3.** (a) TEM and (b) nanoparticles diameter distribution histogram for the Mo<sub>2</sub>C sample.

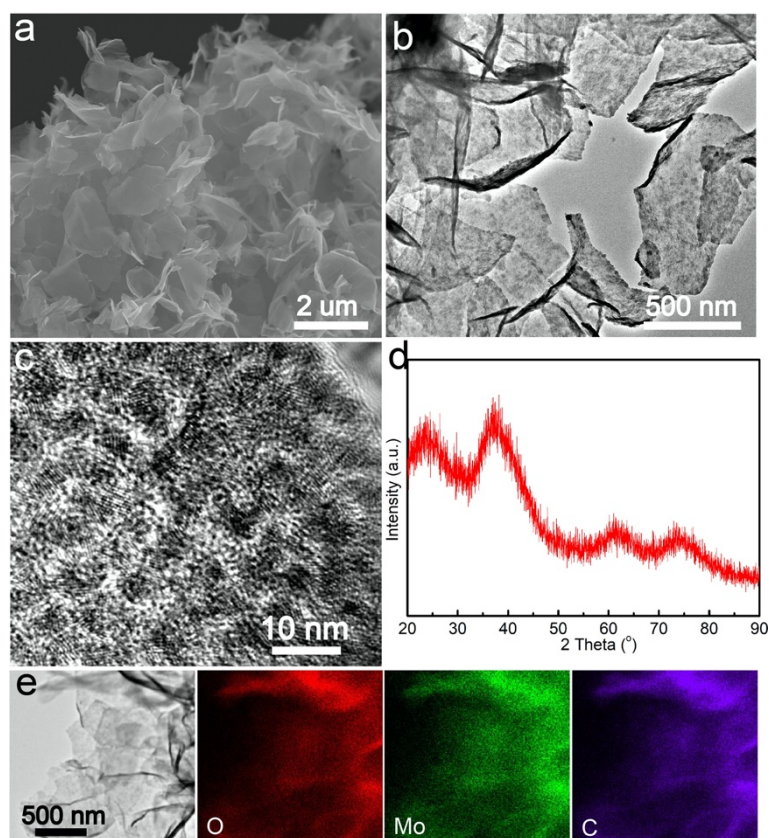

**Figure S4.** (a) SEM, (b) TEM and (c) high-magnification TEM, (d) XRD pattern and (e) EDS mapping images for the MoO<sub>x</sub>C<sub>y</sub> intermediate.

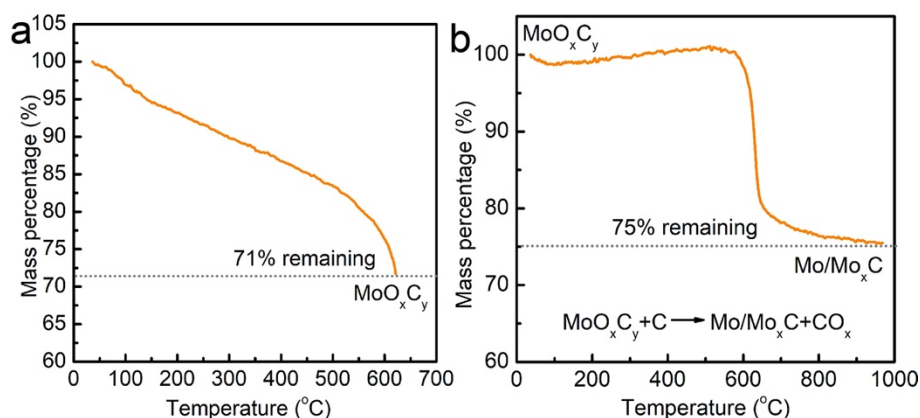

**Figure S5.** TGA profiles of (a)  $\text{MoO}_x\text{C}_y$  intermediate obtained from the annealing of polymer precursor at 650 °C, and (b)  $\text{Mo/Mo}_x\text{C}$  product obtained from the further annealing of  $\text{MoO}_x\text{C}_y$  at 1000 °C under  $\text{N}_2$  flow.

In Figure S5a, the initial weight loss below 150 °C is ascribed to water evaporation. With the temperature gradually increases, the polymer precursor starts to decomposition along with the formation of  $\text{MoO}_x\text{C}_y$ . When the temperature exceeds 550 °C, a quick weight loss is observed due to the combustion of carbon. The remaining weight after heating to 650 °C is about 71%. In Figure S5b, solid state reaction between  $\text{MoO}_x\text{C}_y$  and carbon occurs accompanied by the carbonization and reduction, generating and releasing  $\text{CO}_x$ .

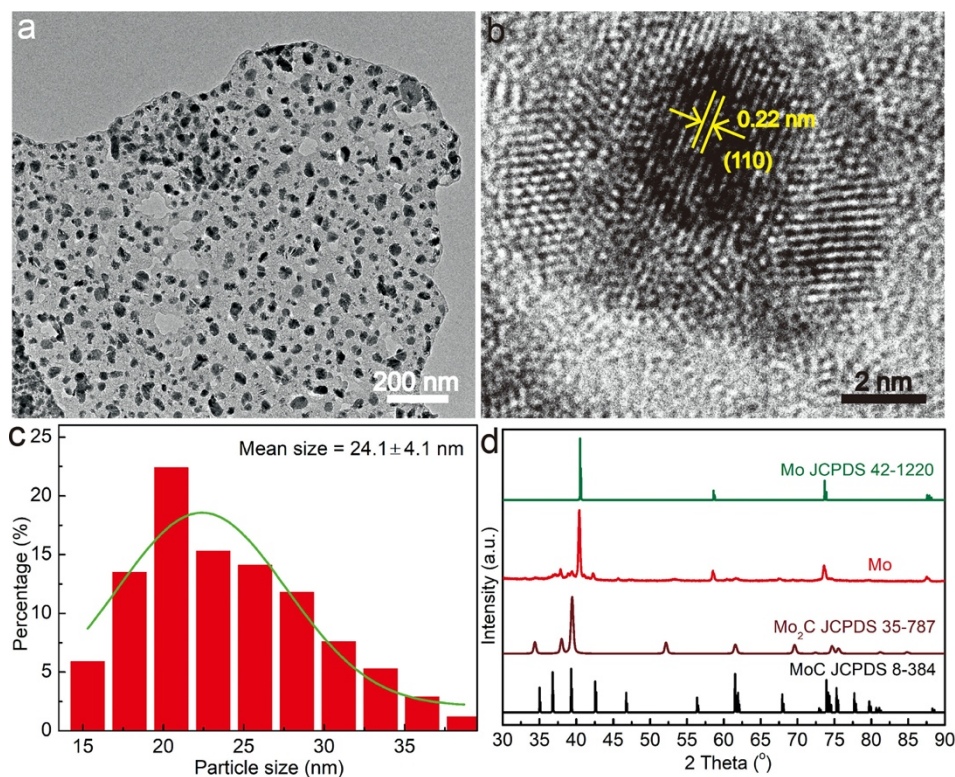

**Figure S6.** (a) TEM (b) HRTEM (c) nanoparticles size distribution histogram and (d) XRD pattern for the metallic Mo sample.

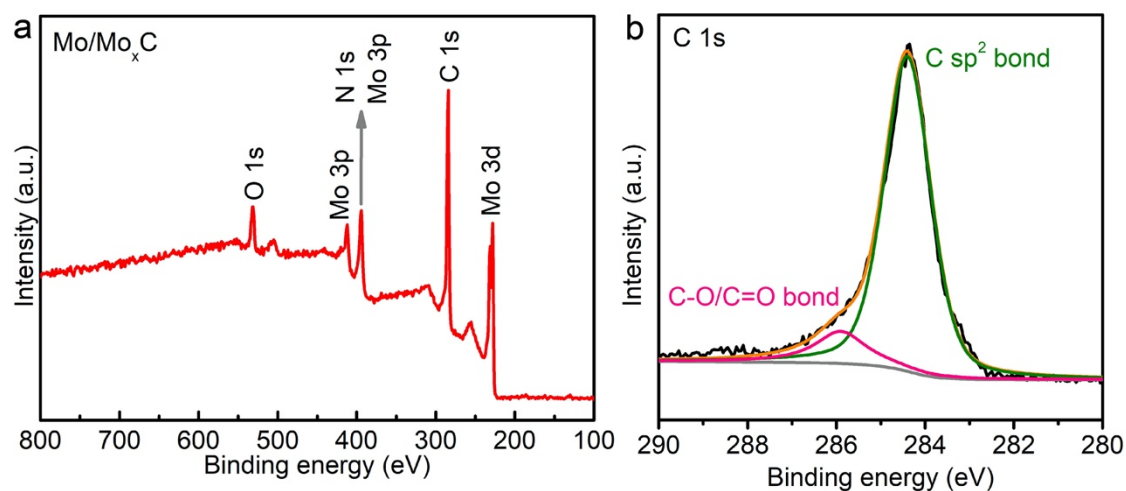

**Figure S7.** (a) Wide-scan survey, and (b) high-resolution C 1s XPS spectra for the Mo/Mo<sub>x</sub>C sample.

**Table S1.** Fitting parameters for Mo signals in Mo/Mo<sub>x</sub>C

| <i>Valence state</i>    | <i>BE (eV)</i> | <i>FWHM</i> | <i>Area</i> |
|-------------------------|----------------|-------------|-------------|
| <i>Mo</i>               | 228.0          | 0.68        | 11050.20    |
|                         | 231.2          | 0.85        | 9027.76     |
| <i>Mo</i> <sup>2+</sup> | 228.3          | 0.88        | 16508.61    |
|                         | 231.5          | 1.15        | 14053.62    |
| <i>Mo</i> <sup>4+</sup> | 229.2          | 1.74        | 8284.90     |
|                         | 232.3          | 1.10        | 3841.25     |
| <i>Mo</i> <sup>6+</sup> | 233.2          | 1.53        | 4348.37     |
|                         | 235.5          | 1.60        | 3468.00     |

Based on the fitted peak area of Mo and the total peak area of Mo 2p, the content of metallic Mo can be calculated as:

$$\frac{\text{peak area of Mo}}{\text{total peak area of Mo 2p}} = 0.28$$

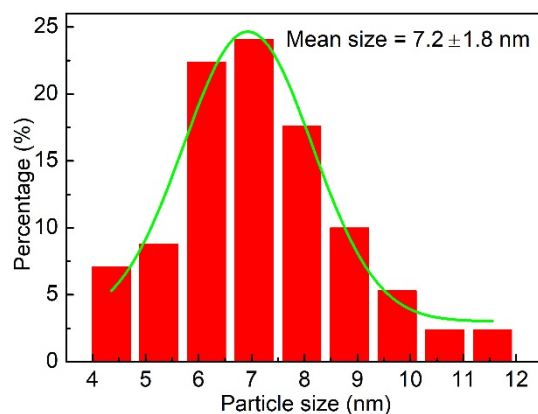

**Figure S8.** Nanoparticles diameter distribution histogram for the Mo/Mo<sub>x</sub>C sample.

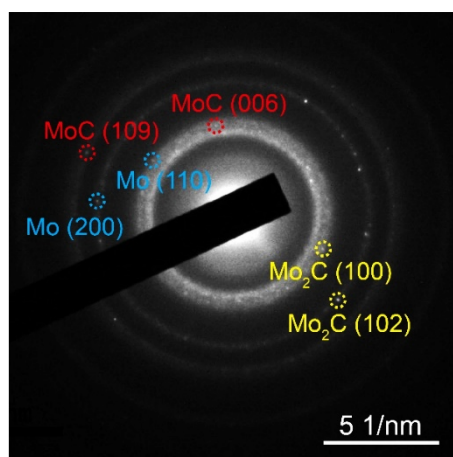

**Figure S9.** Selected area electron diffraction image for the Mo/Mo<sub>x</sub>C sample.

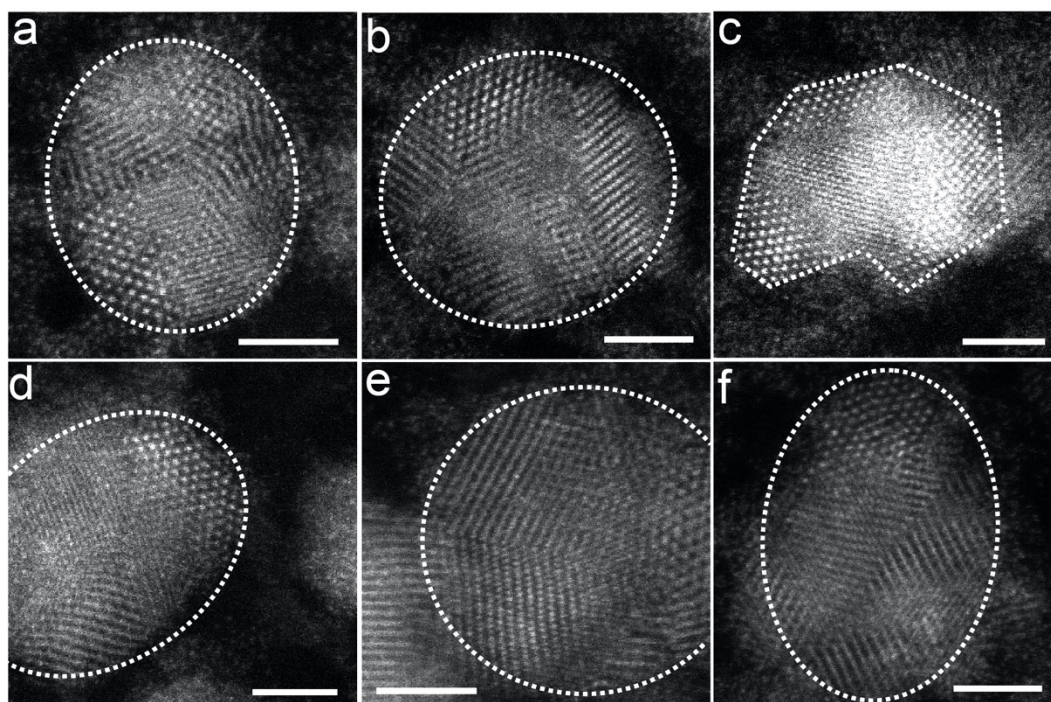

**Figure S10.** STEM images for the Mo/Mo<sub>x</sub>C sample.

As shown in Figure S10, it is observed that nanoparticles are composed of different types of lattice fringes which can be indexed to MoC, Mo<sub>2</sub>C, and metallic Mo, indicating the formation of heterostructured Mo/Mo<sub>x</sub>C. Moreover, massive atomic deficiencies, grain boundaries and dislocations are also observed, especially on the heterogeneous interfaces.

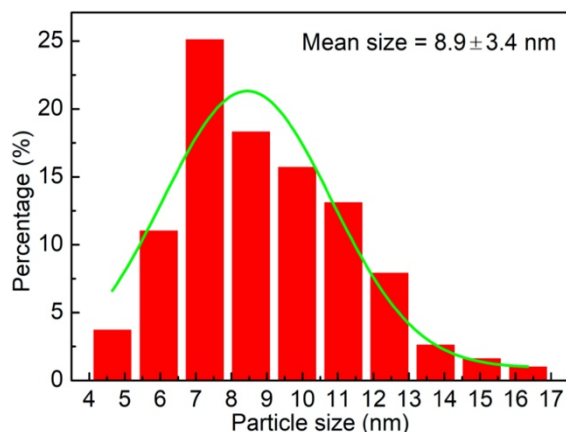

**Figure S11.** Nanoparticles diameter distribution histogram for the Mo<sub>x</sub>C sample.

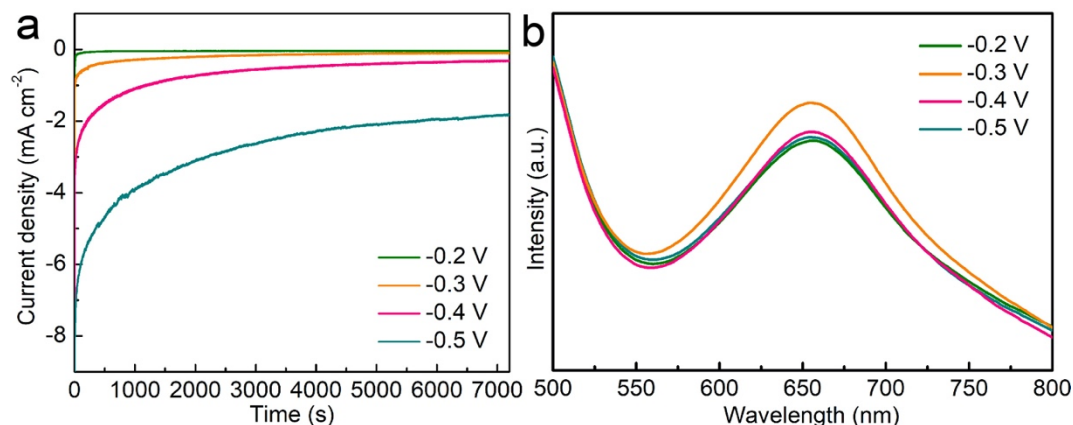

**Figure S12.** (a) Chronoamperometry curves and (b) UV-vis absorption spectra at each given potential for the Mo/Mo<sub>x</sub>C catalyst measured in 0.1 M Na<sub>2</sub>SO<sub>4</sub> (the calibration curve used herein is  $y=0.035x+0.0387$ ).

Figure S12a shows the chronoamperometric curves of the Mo/Mo<sub>x</sub>C catalyst. The current density increases in sequence as the applied potential increases from -0.2 V to -0.5 V (vs. RHE). Figure S12b shows the corresponding UV-Vis absorption spectra. The peak intensity at about 655 nm increases as the potential decreases from -0.5 V to -0.3 V, indicative of the increased NH<sub>3</sub> yield.

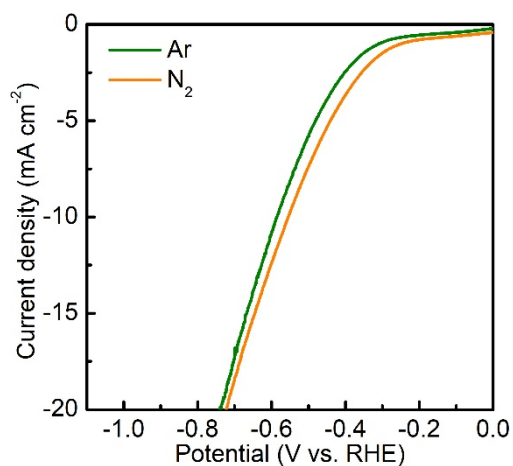

**Figure S13.** LSV curves recorded in  $N_2$ - and Ar-saturated electrolyte for the Mo/Mo<sub>x</sub>C catalyst.

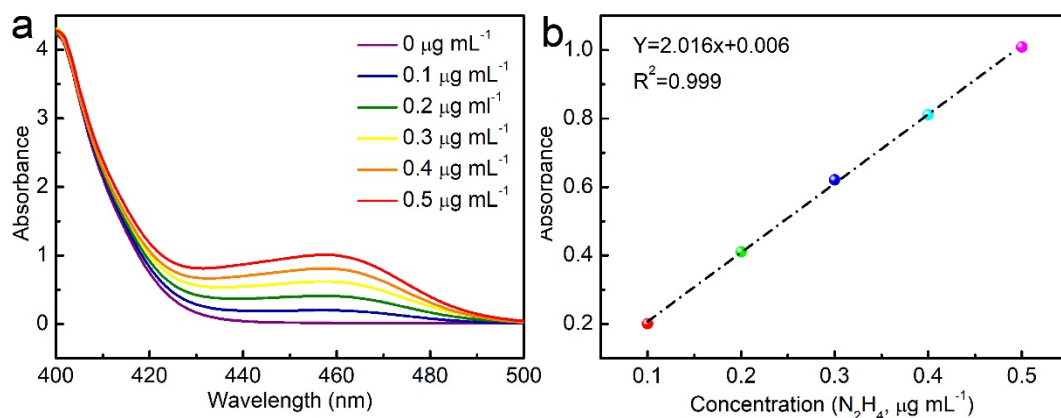

**Figure S14.** (a) UV-vis absorption spectra of 0.1 M  $Na_2SO_4$  electrolyte with various  $N_2H_4$  concentrations. (b) Calibration curve used for the calculation of  $N_2H_4$  concentrations.

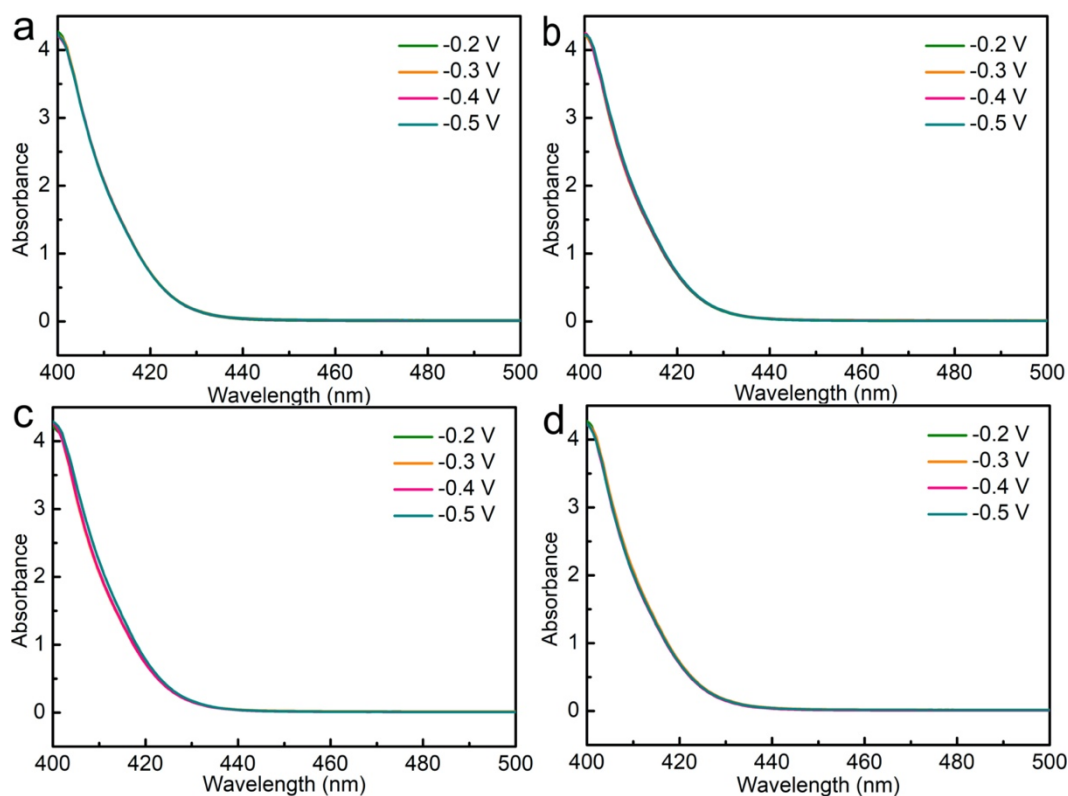

**Figure S15.** UV-vis absorption spectra of the electrolytes estimated by the Watt and Chrisp method for (a) Mo/Mo<sub>x</sub>C, (b) Mo<sub>x</sub>C, (c) metallic Mo, and (d) Mo<sub>2</sub>C catalyst at different potentials.

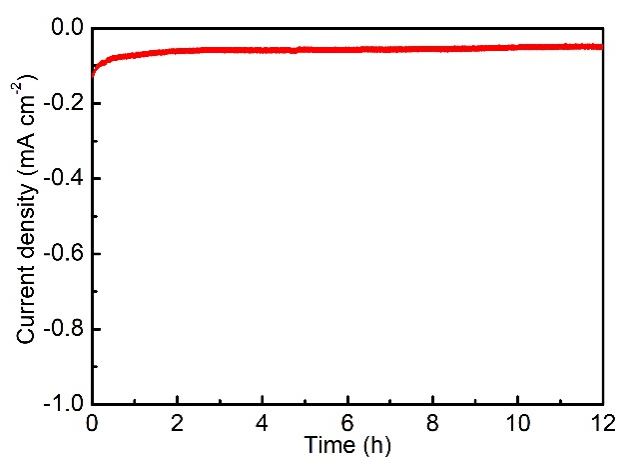

**Figure S16.** Chronoamperometric stability test (at -0.3 V vs. RHE) for the Mo/Mo<sub>x</sub>C catalyst.

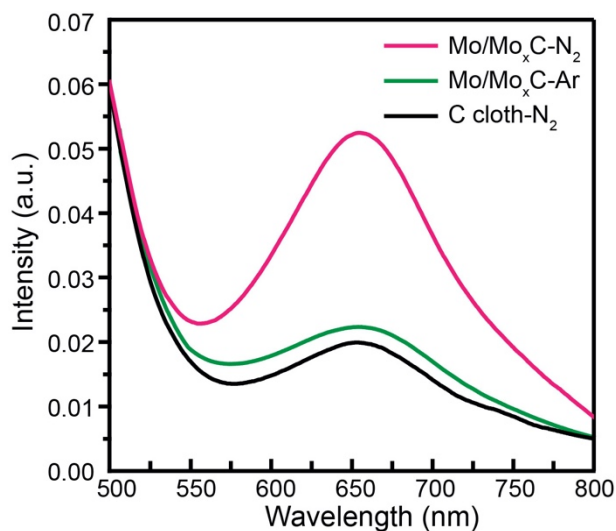

**Figure S17.** UV-vis absorption spectra of the cathode electrolytes stained with indophenol indicator after 2 h potentiostatic test at -0.3 V (vs. RHE) in 0.1 M Na<sub>2</sub>SO<sub>4</sub> for bare carbon cloth measured in N<sub>2</sub>-saturated atmosphere and carbon cloth with the Mo/Mo<sub>x</sub>C catalyst measured in Ar- and N<sub>2</sub>-saturated atmosphere.

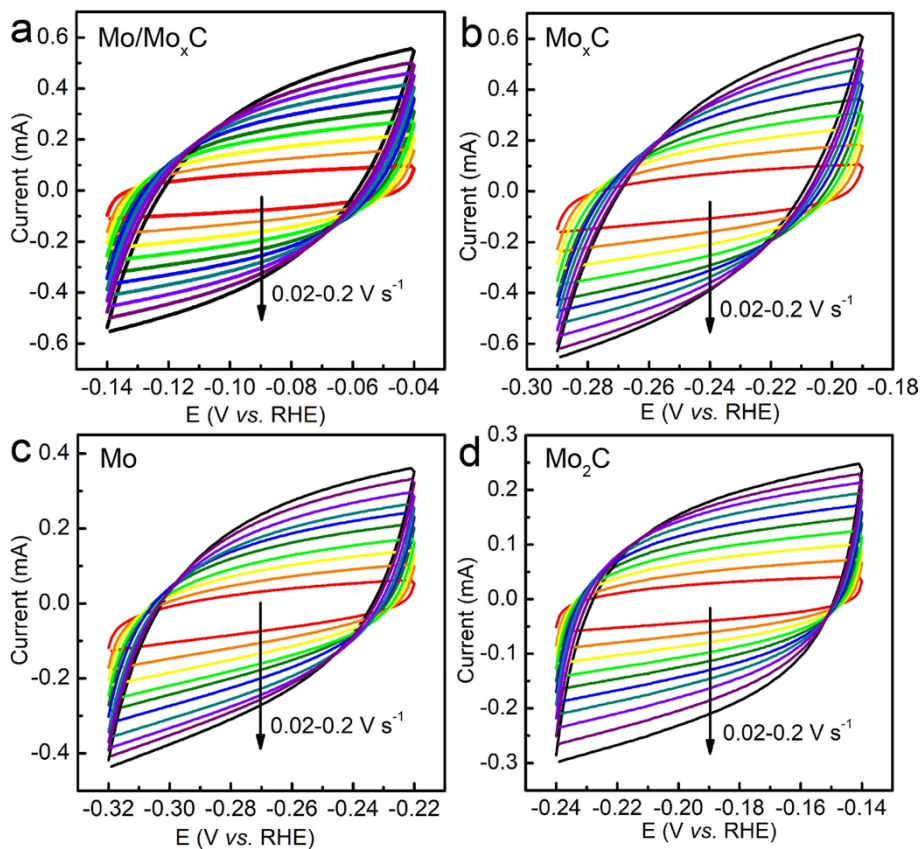

**Figure S18.** CV curves of (a) Mo/Mo<sub>x</sub>C, (b) Mo<sub>x</sub>C, (c) Mo, and (d) Mo<sub>2</sub>C catalysts measured at scan rates from 20 to 200 mV s<sup>-1</sup>.

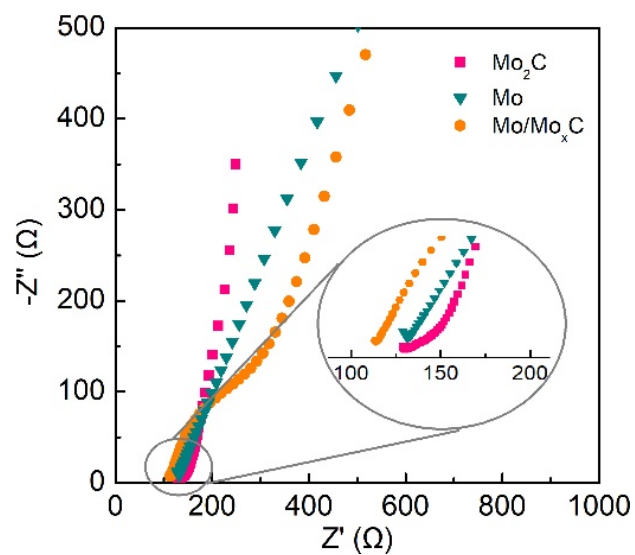

Figure S19. EIS Nyquist plots for the Mo, Mo<sub>2</sub>C and Mo/Mo<sub>x</sub>C catalysts measured in N<sub>2</sub>-saturated 0.1 M Na<sub>2</sub>SO<sub>4</sub> at a potential of -0.3 V (vs. RHE).

**Table S2.** Performance comparison of Mo-based and some precious-metal-based NRR electrocatalysts.

| Catalyst                                                              | NH <sub>3</sub> yield rate                                                            | FE (%)       | electrolyte                              | Ref.                                         |
|-----------------------------------------------------------------------|---------------------------------------------------------------------------------------|--------------|------------------------------------------|----------------------------------------------|
| <b>MoS<sub>2</sub>/CC</b>                                             | 4.94 μg h <sup>-1</sup> cm <sup>-2</sup><br>(-0.5 V vs. RHE)                          | 1.17         | 0.1 M<br>Na <sub>2</sub> SO <sub>4</sub> | Adv. Mater., 2018, 30,<br>1800191.           |
| <b>Mo<sub>2</sub>C/C</b>                                              | 11.3<br>(-0.3 V vs. RHE)                                                              | 7.8          | 0.5 M<br>Li <sub>2</sub> SO <sub>4</sub> | Adv. Mater., 2018, 30,<br>1803694.           |
| <b>MoO<sub>3</sub><br/>nanosheet</b>                                  | 29.43<br>(-0.5 V vs. RHE)                                                             | 1.9          | 0.1 M HCl                                | J. Mater. Chem. A, 2018, 6,<br>12974.        |
| <b>(110)-oriented<br/>Mo</b>                                          | 3.09 x 10 <sup>-11</sup> mol s <sup>-1</sup><br>cm <sup>-2</sup> (-0.49 V vs.<br>RHE) | 0.72         | 0.5 M H <sub>2</sub> SO <sub>4</sub>     | J. Mater. Chem. A, 2017, 5,<br>18967.        |
| <b>SA-Mo/NPC</b>                                                      | 34.0 ± 3.6 μg h <sup>-1</sup> mg <sup>-1</sup><br>(-0.3V vs. RHE)                     | 14.6<br>±1.6 | 0.1 M KOH                                | Angew. Chem. Int. Ed,<br>2019, 58, 2321.     |
| <b>Au nanorod</b>                                                     | 1.648 μg h <sup>-1</sup> cm <sup>-2</sup><br>(-0.2V vs. RHE)                          | 4.02         | 0.1 M KOH                                | Adv. Mater., 2017, 29,<br>1604799.           |
| <b>Au/CeO<sub>x</sub>-RGO<br/>hybrid</b>                              | 8.3 μg h <sup>-1</sup> mg <sup>-1</sup><br>(-0.2 V vs. RHE)                           | 10.10        | 0.1 M HCl                                | Adv. Mater., 2017, 29,<br>1700001.           |
| <b>Pd<sub>0.2</sub>Cu<sub>0.8</sub>/rGO<br/>composite</b>             | 2.80 μg h <sup>-1</sup> mg <sup>-1</sup><br>(-0.2 V vs. RHE)                          | ~            | 0.1 M KOH                                | Adv. Energy Mater., 2018,<br>8, 1800124.     |
| <b>Ru@ZrO<sub>2</sub>/NC</b>                                          | 3.7 mg h <sup>-1</sup> mg <sub>Ru</sub> <sup>-1</sup><br>(-0.21 V vs. RHE)            | 21           | 0.1 M HCl                                | Chem, 2019, 5, 204-214.                      |
| <b>Bi<sub>4</sub>V<sub>2</sub>O<sub>11</sub><br/>/CeO<sub>2</sub></b> | 23.21 μg h <sup>-1</sup> mg <sup>-1</sup><br>(-0.2 V vs. RHE)                         | 10.16        | 0.1 M HCl                                | Angew. Chem. Int. Ed.,<br>2018, 57, 6073.    |
| <b>Fe<sub>3</sub>O<sub>4</sub>/Ti</b>                                 | 5.6 × 10 <sup>-11</sup> mol s <sup>-1</sup> cm <sup>-2</sup><br>(-0.4 V vs. RHE)      | 2.6          | 0.1 M<br>Na <sub>2</sub> SO <sub>4</sub> | Nanoscale, 2018, 10, 14386.                  |
| <b>N-doped<br/>carbon/Fe<sub>3</sub>C</b>                             | 15.804 μg h <sup>-1</sup> mg <sup>-1</sup><br>(-0.4 V vs. RHE)                        | 2.72         | 0.1 M KOH                                | Catal. Sci. Technol., 2019,<br>9, 1208-1214. |
| <b>Boron-Doped<br/>Graphene</b>                                       | 9.8 μg h <sup>-1</sup> cm <sup>-2</sup><br>(-0.5 V vs. RHE)                           | 10.8         | 0.05 M<br>H <sub>2</sub> SO <sub>4</sub> | Joule, 2018, 2, 1-13.                        |
| <b>B<sub>4</sub>C/CPE</b>                                             | 26.57 μg h <sup>-1</sup> mg <sup>-1</sup><br>(-0.75 V vs. RHE)                        | 15.95        | 0.1M HCl                                 | Nat. Commun., 2018, 9,<br>3485.              |
| <b>Mo/Mo<sub>x</sub>C</b>                                             | 20.4 ug h <sup>-1</sup> mg <sup>-1</sup><br>(-0.3 V vs. RHE)                          | 18.9         | 0.1 M<br>Na <sub>2</sub> SO <sub>4</sub> | This work                                    |
